# Supplementary material for: Boundary layer models for calving marine outlet glaciers
Source: Copernicus journal article supplement (doi:10.5194/tc-11-2283-2017), 2017-10-05
Supplement: Supplementary file 1 [file tc-11-2283-2017-supplement.zip]

Archive with 5 entries (5 files):
- SchoofDavisPopa_supplementary.pdf
- steady_state_code.tar.gz
- boundary_layer_code.tar.gz
- README
- tc-11-2283-2017-supplement-title-page.pdf
