# Supplementary material for: Boundary layer models for calving marine outlet glaciers
Source: Copernicus journal article supplement (doi:10.5194/tc-11-2283-2017), 2017-10-05
Supplement: Supplementary file 1 [file tc-11-2283-2017-supplement.zip › README]

This supplementary material consists of three parts:
1. A text file detailing further calculations that are referenced in the main article file
2. Two .tar.gz archives containing the MATLAB codes used to compute steady state and boundary layer solutions as described in the main article file
