# Supplementary material for: Boundary layer models for calving marine outlet glaciers
Source: Copernicus journal article supplement (doi:10.5194/tc-11-2283-2017), 2017-10-05
Supplement: Supplementary file 1 [file tc-11-2283-2017-supplement.zip › tc-11-2283-2017-supplement-title-page.pdf]

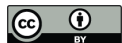

## *Supplement of*

# **Boundary layer models for calving marine outlet glaciers**

**Christian Schoof et al.**

*Correspondence to:* Christian Schoof ([cschoof@eoas.ubc.ca](mailto:cschoof@eoas.ubc.ca))

- [tc-11-2283-2017-supplement-title-page.pdf](#)
- [README](#)
- [SchoofDavisPopa\\_supplementary.pdf](#)
- [boundary\\_layer\\_code.tar.gz](#)
- [steady\\_state\\_code.tar.gz](#)

The copyright of individual parts of the supplement might differ from the CC BY 3.0 License.
